CORRECTION

## Correction: The early-life fecal microbiota is associated with litter of origin but not with susceptibility to ETEC F4ab-mediated post-weaning diarrhea in CHCF1 genotyped pigs

The *PLOS One* Staff

In the Results, section, the following information from the caption for [Fig 2](#) was incorrectly included:

Analysis for difference between CHCF1 RS and RR genotypes across timepoints showed that the number of observed OTUs was significantly higher in pigs with CHCF1 RS genotype: 103, 95% CI [18.90; 192.76],  $p=0.014$ . The observed number of OTUs increased significantly based on age: coef: 36.69, 95% CI [5.37; 67.79],  $p=0.02$ . Shannon and Simpson indices were not significantly different between genotypes or based on age.

Please see the complete, correct [Fig 2](#) caption here.

The publisher apologizes for the errors.

### Funding

### Reference

1. Rydal MP, Poulsen LL, Nielsen JP. The early-life fecal microbiota is associated with litter of origin but not with susceptibility to ETEC F4ab-mediated post-weaning diarrhea in CHCF1 genotyped pigs. *PLoS One*. 2025;20(5):e0323875. <https://doi.org/10.1371/journal.pone.0323875> PMID: [40440292](https://pubmed.ncbi.nlm.nih.gov/40440292/)

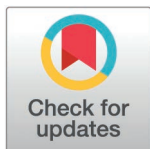

### OPEN ACCESS

Citation: The *PLOS One* Staff (2026) Correction: The early-life fecal microbiota is associated with litter of origin but not with susceptibility to ETEC F4ab-mediated post-weaning diarrhea in CHCF1 genotyped pigs. *PLoS One* 21(4): e0346785. <https://doi.org/10.1371/journal.pone.0346785>

**Published:** April 7, 2026

**Copyright:** © 2026 The *PLOS One* Staff. This is an open access article distributed under the terms of the [Creative Commons Attribution License](#), which permits unrestricted use, distribution, and reproduction in any medium, provided the original author and source are credited.

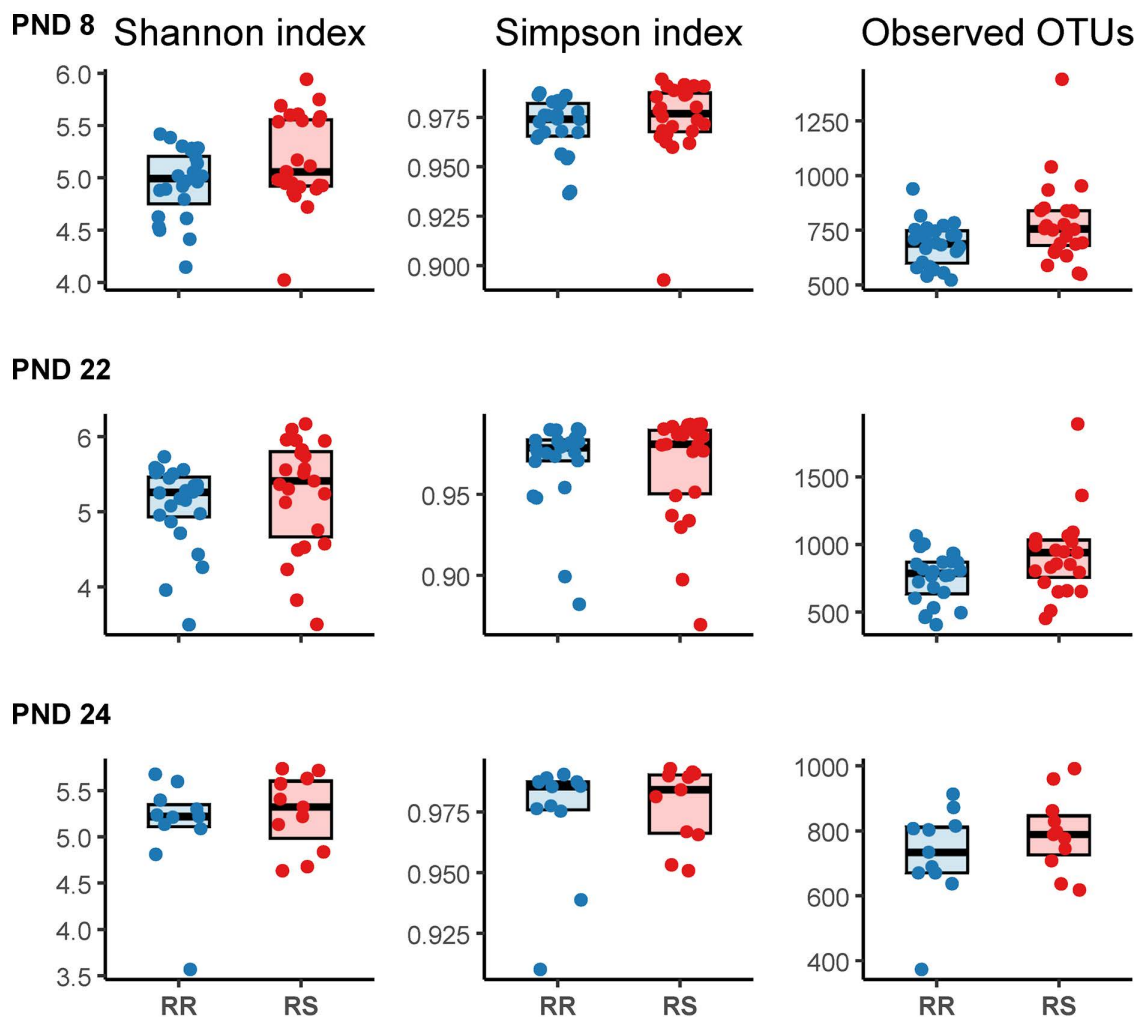

**Fig 2. Alpha diversity boxplots by timepoint and CHCF1 genotype.** The bold line represents the median. RR: homozygous resistant, RS: heterozygous susceptible. PND 8: early lactation (RR: n=24 pigs, RS: n=24 pigs). PND 22: late lactation/weaning (RR: n=24 pigs, RS: n=23 pigs). PND 24: two days after weaning at experimental facility (RR: n=11 pigs, RS: n=11 pigs). Data was first analyzed at each timepoint using linear mixed models with litter included as random effect. PND 8: Shannon index: coef: 0.21, 95% confidence interval (CI) [-0.01; 0.43], p=0.05, Simpson index: coef: 0.003 95% CI [-0.006;0.01], p=0.4, Observed number of OTUs: coef: 70.6, 95% CI [-11.0; 155.9], p=0.08. PND 22: Shannon index: coef: 0.16, 95% CI [-0.23;0.53], p=0.3, Simpson index: coef: -0.002, 95% CI [-0.02;0.01], p=0.7, Observed number of OTUs: coef: 163.9, 95% CI [23.90;303.9], p=0.02. PND 24: Shannon index: coef: 0.16, 95% CI [-0.22;0.54] p=0.3, Simpson index: coef: 0.005, 95% CI [-0.01;0.02], p=0.5, Observed number of OTUs: coef: 66.4, 95% CI [-44.6;177.5], p=0.2. Analysis for difference between CHCF1 RS and RR genotypes across timepoints showed that the number of observed OTUs was significantly higher in pigs with CHCF1 RS genotype: 103, 95% CI [18.90; 192.76], p=0.014. The observed number of OTUs increased significantly based on age: coef: 36.69, 95% CI [5.37; 67.79], p=0.02. Shannon and Simpson indices were not significantly different between genotypes or based on age.

<https://doi.org/10.1371/journal.pone.0346785.g002>
